1 Performance of empirical and model-based classifiers for  
2 detecting sucrase-isomaltase inhibition using the <sup>13</sup>C-sucrose  
3 breath test

4 **Authors:** Hannah Van Wyk<sup>1</sup>, Gwenyth O. Lee<sup>2</sup>, Robert J. Schillinger<sup>3,4</sup>,  
5 Christine A. Edwards<sup>4</sup>, Douglas J. Morrison<sup>3</sup>, Andrew F. Brouwer<sup>1,\*</sup>

6 1. Department of Epidemiology, University of Michigan, 1415 Washington Heights, Ann Arbor, 48109,  
7 MI, United States.

8 2. Rutgers Global Health Institute, Rutgers University, 112 Paterson St. New Brunswick, NJ 08901

9 3. Scottish Universities Environmental Research Centre (SUERC), University of Glasgow, Rankine  
10 Avenue, East Kilbride, G750QF, United Kingdom.

11 4. School of Medicine, Dentistry and Nursing, University of Glasgow, New Lister Building, Alexandra  
12 Parade, Glasgow G31 2ER, United Kingdom.

13 \*Corresponding author: [brouweaf@umich.edu](mailto:brouweaf@umich.edu)

14

15

## 16 **Abstract**

17 **Background:** Environmental enteric dysfunction (EED) is a syndrome characterized by epithelial  
18 damage including blunting of the small intestinal villi and altered digestive and absorptive capacity  
19 which may negatively impact linear growth in children. The  $^{13}\text{C}$ -sucrose breath test ( $^{13}\text{C}$ -SBT) has  
20 been proposed to estimate sucrase-isomaltase (SIM) activity, which is thought to be reduced in EED.  
21 We previously showed how various summary measures of the  $^{13}\text{C}$ -SBT breath curve reflect SIM  
22 inhibition. However, it is uncertain how the performance of these classifiers is affected by test  
23 duration.

24 **Methods:** We leveraged SBT data from a cross-over study in 16 adults who received 0, 100, and 750  
25 mg of Reducose, a natural SIM inhibitor. We evaluated the performance of a pharmacokinetic-model-  
26 based classifier,  $\rho$ , and three empirical classifiers (cumulative percent dose recovered at 90 minutes  
27 (cPDR90), time to 50% dose recovered, and time to peak dose recovery rate), as a function of test  
28 duration using receiver operating characteristic curves. We also assessed the sensitivity, specificity,  
29 and accuracy of consensus classifiers.

30 **Results:** Test durations of less than 2 hours generally failed to accurately predict later breath curve  
31 dynamics. The cPDR90 classifier had the highest area-under-the-curve and, by design, was robust to  
32 shorter test durations. For detecting mild SIM inhibition,  $\rho$  had a higher sensitivity.

33 **Conclusions:** We recommend SBT tests run for at least a 2-hour duration. Although cPDR90 was the  
34 classifier with highest accuracy and robustness to test duration in this application, concerns remain  
35 about its sensitivity to misspecification of  $\text{CO}_2$  production rate. More research is needed to assess  
36 these classifiers in target populations.

37 **Keywords:** environmental enteric dysfunction,  $^{13}\text{C}$ -sucrose breath test, sucrase-isomaltase inhibition,  
38 mechanistic model, classifier

39

## 40 Introduction

41 Environmental enteric dysfunction (EED) is characterized by atrophy of the small intestinal villi,  
42 resulting in increased intestinal permeability and nutrient malabsorption. It is thought to be highly  
43 prevalent among people in low- and middle-income countries who lack access to improved water,  
44 sanitation, and hygiene [1] and are therefore highly exposed to enteric pathogens [2,3]. EED is  
45 thought to play a central role in impaired linear growth (stunting) in infants and young children,[4]  
46 which impacts about 150 million children globally.

47 EED may be detected through the identification of histological features in small intestinal biopsies  
48 [5]. However, biopsies are invasive, require specialist skills and settings and are ethically questionable  
49 in sub-clinical EED, limiting the ability to accurately, efficiently, and inexpensively identify EED,  
50 especially in low-resource settings [6]. The most widely accepted non-invasive test, the  
51 lactulose:mannitol/rhamnose dual sugar urine absorption test, is time-consuming to administer and  
52 results may be inconsistent across laboratory platforms [7]. The  $^{13}\text{C}$  sucrose breath test ( $^{13}\text{C}$ -SBT) has  
53 been proposed as an alternative [8]. The  $^{13}\text{C}$ -SBT is a stable-isotope breath test in which an individual  
54 ingests a dose of non-radioactive,  $^{13}\text{C}$ -labeled sucrose substrate, which is digested, absorbed, and  
55 metabolized, appearing on the breath as  $^{13}\text{CO}_2$ . The  $^{13}\text{C}$ -SBT is intended to assess the activity of  
56 intestinal enzyme sucrase-isomaltase (SIM), a glucosidase enzyme that catalyzes the hydrolysis of  
57 carbohydrates [9]. Expression of SIM increases towards the tips of intestinal villi and therefore its  
58 activity is thought to be diminished in a damaged intestine [10-12]. Slower recovery of the tracer  
59 breath  $^{13}\text{CO}_2$  therefore indicates reduced gut enzyme metabolic function.

60 Although the  $^{13}\text{C}$ -SBT is attractive as a potential, non-invasive test of EED, it also has some  
61 limitations, which are common across  $^{13}\text{C}$  breath tests. Traditional measures used to interpret breath  
62 tests consist of empirically fitting a parametric curve to the percent dose recovery rate (PDRr) of  
63  $^{13}\text{CO}_2$  on the breath, and calculating summary statistics, such as the cumulative percent dose  
64 recovered at 90 minutes (cPDR90), the time to peak PDRr ( $T_{peak}$ ), or the time to 50 percent dose  
65 recovered ( $T_{50}$ ) [13, 14]. However, these empirical measurements do not necessarily capture the  
66 underlying biological processes giving rise to the PDRr curve, and thus may be confounded by  
67 multiple aspects of the metabolism, some of which are unrelated to gut function. To address this  
68 concern we developed a mechanistic, pharmacokinetic model whose parameters represent the  
69 underlying biological processes occurring in the metabolism of the  $^{13}\text{C}$ -labeled sucrose tracer [15]. A  
70 model-based diagnostic  $\rho$  performed comparably to the highest-performing summary statistics in  
71 identifying experimentally induced sucrase-isomaltase inhibition in healthy adults [16].

72 In this analysis, we revisit these experiments to assess how the performance of the four highest  
73 performing classifiers, namely  $\rho$ , cPDR90,  $T_{peak}$  and  $T_{50}$ , depend on the test duration. While  
74 experiments establishing and evaluating the SBT have used test durations of 4-8 hours [8, 15], there is

75 a strong need to reduce the testing burden on participants, particularly for the target population of  
76 infants and children under 5 years. Additionally, because cPDR90,  $T_{peak}$ ,  $T_{50}$ , and  $\rho$  capture different  
77 information about the breath curve, we will determine if consensus classifiers combining two or more  
78 classifiers can produce a more reliable diagnosis. In this research, we address these research gaps by  
79 assessing the accuracy of SBT curve projections based on shorter test duration, the performance of  
80 these three classifiers across test durations, and performance of consensus classifiers.

## 81 **Methods**

### 82 **Data**

83 The  $^{13}\text{C}$ -SBT breath curves used in this study were obtained in a crossover study conducted in  
84 Glasgow, United Kingdom, as previously described [16]. In brief, eighteen healthy adults were  
85 recruited to complete three breath test experiments under different experimental conditions designed  
86 to simulate different degrees of SIM inhibition. In this analysis, we only use data from the 16  
87 participants who completed all three breath tests. The participants consisted of 8 female and 8 male  
88 participants with a mean age of 24.2 (SD= 5.0) and mean BMI of 24.5 (SD = 5.2). Participants  
89 were instructed to follow a low  $^{13}\text{C}$  diet for the three days preceding the experiments and to fast  
90 for eight hours prior to the test. In the first experiment, participants ingested 25 mg (0.84 mmol  
91  $^{13}\text{C}$ ) of highly enriched sucrose ( $\geq 99$  atom% enriched; Sigma-Aldrich) to complete a baseline test.  
92 Breath samples were collected every 15 minutes for 4 hours into 12mL Exetainer breath-sample vials  
93 (Labco, United Kingdom). The relative difference in parts per thousand between the ratio  
94  $R_s = [^{13}\text{C}]/[^{12}\text{C}]$  in the sample and the ratio ( $R_{std}$ ) of the laboratory  $\text{CO}_2$  standard (calibrated to the  
95 international calibration standard, VPDB,  $R = 0.0112372$ ) were determined by isotope ratio mass  
96 spectrometry (IRMS, AP-2003, Manchester, United Kingdom). Details on how this was converted to  
97 percent dose recovery rate are described in previous publications [15]. In the remaining experiments,  
98 participants were given in a random order either 100 and 750 mg of Reducose® (Phynova Group Ltd.,  
99 Oxford, UK), a mulberry leaf extract (MLE) containing 5% 1-Deoxynojirimycin (an active  $\alpha$ -  
100 glucosidase inhibitor) immediately prior to ingesting the 25 mg sucrose. Mulberry leaf extract has  
101 been shown to function as an intestinal SIM inhibitor, thus it is expected to induce similar  $^{13}\text{CO}_2$   
102 excretion patterns to those that would be observed in patients with EED. The low dose of 100 mg  
103 Reducose was given to induce mild SIM inhibition, and the high dose of 750 mg was given to induce  
104 severe inhibition. Investigators received written informed consent from all participants and the study  
105 design was approved by the University of Glasgow College of Medical Veterinary and Life Sciences  
106 Research Ethics Committee (Application Number: 200190155).

### 107 **Mechanistic Model**

108 In previous work [15], we developed a mechanistic, compartmental differential equation model that

109 captured  $^{13}\text{C}$ -SBT breath curve dynamics and was practically identifiable, i.e., had parameters that  
110 could be uniquely estimated from data. In this model, the breath curve dynamics can be approximated  
111 as a combination of a gamma-distributed process with pharmacokinetic rate parameter  $\rho/2$  and shape  
112 parameter 2 and an exponentially distributed process with rate parameter  $\pi\rho$ . Because of the  
113 limitations of only observing the breath, the specific metabolic processes that these model processes  
114 represent are unknown *a priori*. In previous work [16], we demonstrated that both sucrose-isomaltase  
115 inhibition and the difference between fructose and glucose in the transport to and metabolism by the  
116 liver were reflected in the gamma-distributed process. In the model, we also account for the fraction  
117 of  $^{13}\text{C}$  that is exhaled,  $\kappa$ , as opposed to being secreted in urine or sequestered in adipose tissue.

118 When  $\pi \neq 1$ , there is a closed-form solution for PDRr,

$$y(t) = \frac{100\kappa\pi\rho}{(1-\pi)^2} (e^{-\pi\rho t} + ((\pi-1)\rho t - 1)e^{-\rho t}), \quad (1)$$

119 and the cPDR is given by

$$Y(t) = 100\kappa \left( 1 - \frac{e^{-\pi\rho t} + ((\pi-1)\rho t + \pi - 2)\pi e^{-\rho t}}{(1-\pi)^2} \right). \quad \#(2)$$

120

121 The classifiers we consider in this analysis are all obtained directly from the above equations:

122  $\text{cPDR}_{90} = Y(90)$ ,  $T_{peak} = \text{argmax}_t y(t)$ ,  $T_{50}(\omega) = \{t \mid Y(t) = \frac{Y(\omega)}{2}\}$ , where  $\omega$  is the test length, and  $\rho$   
123 is the model-based classifier based on previous work [16]. Note that the definition of  $T_{50}$  used here,  
124 50% of the cumulative percent dose recovered at test length  $\omega$ , is different from previous work, [15]  
125 which defined it as time to recovery of 50% of the dose given. We use our definition here because  
126 most test participants do not recover 50% of the full dose over the testing period, especially in the  
127 case of mild-to-severe SIM inhibition.

128

## 129 **Parameter estimation**

130 We estimated the parameter set  $\theta = \{\rho, \pi\rho, \kappa\}$  corresponding to the best fit model by minimizing the  
131 negative log-likelihood (NLL), given by

$$NLL(\theta) = \frac{n}{2} \log(2\bar{\pi}) + \frac{n}{2} \log(\sigma^2) + \frac{1}{2\sigma^2} \sum_i (y(\theta; t_i) - z_i)^2, \quad \#(3)$$

132 where  $y(\theta; t_i)$  is the value of the modeled PDR at time  $t_i$ ,  $n$  is the number of data points,  $\bar{\pi}$  is the  
133 mathematical circle constant,  $\sigma$  is the standard deviation previously estimated to be 0.555 from best-  
134 fit curves [15], and  $t_i$  is the time at which measurement  $z_i$  was taken. In the case where the peak  
135 PDRr is not observed during the testing period, which was common among the 750 mg Reducose  
136 samples,  $\pi\rho$  and  $\kappa$  are not identifiable. In this case, we added a penalty of size  $0.1\kappa$  onto the NLL to  
137 force the optimizer to select lower values of  $\kappa$ . This forces the optimizer to choose larger values of  $\pi\rho$

138 that generate more realistic PDRr curves that do not extend over unrealistically long periods of time.

### 139 **Analytic Approach**

140 The three objectives of this analysis were to 1) compare the accuracy of model projections as a  
141 function of test duration, 2) compare the performance of cPDR,  $T_{peak}$ ,  $T_{50}$ , and  $\rho$ , as a function of test  
142 duration, and 3) assess the performance of consensus classifiers that combine two or more of the  
143 single classifiers. In this analysis, we examined test durations of 60, 90, 120, and 240 minutes. The  
144 following analysis plan outlines our approach:

145 1.) *Comparing model fits for 60-, 90-, 120-, and 240-minute duration tests.* For each participant  $j$ , we  
146 estimated  $\hat{\theta}_{60,j}$ ,  $\hat{\theta}_{90,j}$ ,  $\hat{\theta}_{120,j}$ , and  $\hat{\theta}_{240,j}$ , corresponding to the nine parameters that minimized the  
147 NLL for the baseline, 100 mg Reducose, and 750 mg Reducose breath curves, assuming that we  
148 only had the data from the first 60, 90, 120, and full 240 minutes, respectively. Then, to compare  
149 the model fits for the 60-, 90-, and 120-minute tests to the full dataset, we simulated the model for  
150 240 minutes using each parameter set and calculated the NLL from each simulation against the  
151 full 240-minute data.

152 2.) *Comparing receiver operator characteristic (ROC) curves for  $\rho$ , cPDR,  $T_{50}$  and  $T_{peak}$  for 60-, 90-,*  
153 *120-, and 240-minute duration tests.* We first noted that breath test curves that are initially  
154 slower (have a lower PDRr) also sustain a higher PDRr longer than the faster curves, allowing  
155 them to “catch up” to cumulative dose recovered of faster curves over time, which have a higher  
156 maximum PDRr, but a sharper curve around the peak. Therefore, the value of cPDR at a later time  
157 may be a less effective classifier than the value at an earlier time, and the cPDR with the highest  
158 dialogistic capability should be near the median  $T_{peak}$ . Thus, we first determined which cPDR  
159 classifier (cPDR60, cPDR90, cPDR120, or cPDR240) resulted in the most accurate classification  
160 using  $\hat{\theta}_{240,j}$ . As discussed in the results, we selected cPDR90. Then, we simulated the model for  
161 each parameter set  $\theta_{60,j}$ ,  $\theta_{90,j}$ ,  $\theta_{120,j}$ , and  $\theta_{240,j}$ , and estimated  $\rho$ , cPDR90,  $T_{50}$  and  $T_{peak}$  in each  
162 case. We generated receiver operator characteristic (ROC) curves (which plot the true positive  
163 rate against the false positive rate as the classification threshold is varied) for all 12 combinations  
164 of test duration and classifier, for each of 4 groupings of the MLE experiments, corresponding to  
165 different clinical scenarios:

- 166 1. Detection of *any* SIM inhibition (baseline versus *either* 100 or 750 mg MLE),
- 167 2. Distinguishing between severe SIM inhibition vs none-to-mild (baseline or 100 mg MLE  
168 versus 750 mg MLE),
- 169 3. Detection of mild SIM inhibition (i.e., baseline versus 100 mg MLE),
- 170 4. Detection of severe SIM inhibition (baseline versus 750 mg MLE).

171 The goal of the first two diagnostic groupings is to offer a single metric that captures the test’s

172 ability to generate a binary diagnosis of SIM inhibition when the classifier takes any level of  
173 inhibition as an input, as would be the case in real-world applications. The last two classifiers  
174 assess the classifiers' ability to identify differences in each of the three groups. For each ROC  
175 curve, we calculated the area under the curve (AUC) statistic, which represents the probability  
176 that a randomly selected positive sample is ranked as more likely to have SIM inhibition than a  
177 randomly selected negative sample [17].

178 3.) *Assessment of single and consensus classifiers.* We assessed the accuracy, sensitivity, specificity,  
179 and Matthew's correlation coefficient (MCC) of each classifier at their optimal thresholds (the  
180 cutoff threshold that maximizes the sum of the sensitivity and specificity of the test [18]). The  
181 MCC is an alternative accuracy measurement that is preferred for unbalanced datasets and has a  
182 range of [-1,1] where 1 means perfect classification, 0 corresponds to a coin toss classifier, and -1  
183 is perfect misclassification [19]. We further examined the accuracy, sensitivity, specificity, and  
184 Matthew's correlation coefficient (MCC) of consensus classifiers consisting of each combination  
185 of the individual metrics  $\rho$ , cPDR90,  $T_{50}$ , and  $T_{peak}$  at their optimal thresholds. To generate these  
186 statistics for each participant in each experiment, we generated consensus diagnoses for each  
187 participant based on each combination of the individual classifiers. For example, assuming that a  
188 positive diagnosis of SIM inhibition is defined by *both*  $\rho$  and cPDR90 ( $\rho \cap$  cPDR90) indicating  
189 inhibition or assuming that a positive diagnosis is defined by *either*  $\rho$  and cPDR90 ( $\rho \cup$  cPDR90)  
190 indicating inhibition. We assessed this for each possible combination of three classifiers at a time.  
191 For example, for  $\rho$ , cPDR90, and  $T_{50}$  that is:  $\rho$  only, cPDR90 only,  $T_{50}$  only,  $\rho \cap$  cPDR90,  $\rho \cap$   $T_{50}$ ,  
192 cPDR90  $\cap$   $T_{50}$ ,  $\rho \cap$  cPDR90  $\cap$   $T_{50}$ ,  $\rho \cup$  cPDR90,  $\rho \cup$   $T_{50}$ , cPDR90  $\cup$   $T_{50}$ , and a majority rules  
193 classifier. For the majority rules classifier, a positive diagnosis was generated if at least two of the  
194 individual classifiers are positive. To compare consensus classifier performances for each of the  
195 three MLE doses, we generated this result for each of the same four comparison groups outlined  
196 in step 2. We repeated this for the 60-, 90-, and 120-minute test lengths to assess classifier  
197 robustness to decreased data.

198

## 199 **Results**

200 *Comparing model fits for 60-, 90-, 120-, and 240-minute tests.* Projections from fitting the model only  
201 to the first 60 minutes of the data were consistently poor fits for the later data (illustrative examples  
202 given in Fig. 1a, with full results in Fig S1 in the SI appendix). For the 60-min test duration, random  
203 variations present in each data point had a higher influence on the model fit than it did with longer test  
204 periods, causing model trajectories in hours 1–4 to be heavily impacted by these fluctuations.  
205 Additionally, the inability to observe the peak PDRr in the first hour—particularly for the 750 mg  
206 group—meant that  $\pi\rho$  and  $\kappa$  were unidentifiable at this test duration, severely limiting the model's

207 inferential ability for later hours. While the 90-minute test duration generally improved the fit  
208 somewhat, the improvement was not consistent across participants, and many curves fit to 90 minutes  
209 were poorly predictive of later dynamics. When comparing the NLLs between the models fit to data  
210 from each test length (Figure 1b), we found substantial heterogeneity in the impact of test length on  
211 model fit, depending on the participant. The fits at shorter tests lengths were typically better in  
212 participants for whom the peak PDRr was reached within the respective test length (see Fig S1 in the  
213 SI appendix). In general, the projections from curve fit to the data from the first 120 minutes are very  
214 similar to the curves fit to the full data, with some outliers. In the following sections, we assessed how  
215 the improvement in model fit is reflected in the diagnostic capability of the test.

216

217 **Figure 1:** a) Model best fits for 60-, 90-, 120-, and 240-minute test durations for two study  
218 participants b) Boxplot of negative log-likelihoods (NLLs), a measure of how well the model fits the  
219 data, for each test duration, with larger values indicating poorer fit. Plots for all participants are given  
220 in Fig S1 in the SI appendix.

221

222 We also plot the value of each classifier for each participant and test duration across the three MLE  
223 doses to visualize each classifier's sensitivity to MLE dosage (Fig. 2). The plots for cPDR90 (Fig. 2a)  
224 show that this classifier has the strongest distinction between the lowest two doses (i.e., baseline or  
225 100 mg MLE) and the 750 mg dose; however, the distinction between the baseline and 100 mg MLE  
226 dose is minor. By contrast, the figure for  $\rho$  (Fig. 2b) shows a better separation between the value of  $\rho$   
227 and MLE dose, indicating that this classifier may be more sensitive to detecting lower MLE doses,  
228 which represent mild SIM inhibition.

229

230 **Figure 2:** Classifier values for 60-, 90-, 120-, and 240-minute <sup>13</sup>C-sucrose breath test durations for  
231 baseline, 100, and 750 mg doses of Reducose®, a mulberry leaf extract (MLE) that acts as a sucrose-  
232 isomaltase inhibitor for (a) cPDR90, (b)  $\rho$ , (c)  $T_{peak}$ , and (d)  $T_{50}$ .

233

234 *Comparing ROC curves for  $\rho$ , cPDR, time to 50% dose recovered ( $T_{50}$ ), and time to peak ( $T_{peak}$ ) for*  
235 *60-, 90-, 120-, and 240-minute duration tests.* We found that cPDR90 and cPDR60 outperformed  
236 cPDR120, and cPDR240 in ROC curves (Fig. S3). Prior literature has used cPDR90, so, for  
237 consistency, we selected cPDR90 as the cPDR classifier to compare to  $\rho$ ,  $T_{50}$  and  $T_{peak}$ . Our ROC  
238 curves for baseline versus either 100 or 750 mg MLE (Fig 3, blue) and baseline or 100 mg MLE  
239 versus 750 mg MLE (Fig 3, yellow) showed that cPDR90 had the highest AUC for each test length  
240 and comparison group. The cPDR90 classifier also maintained the same AUC (0.99) for each test  
241 length for 0 or 100 mg v. 750 mg and only saw a slight decrease in the AUC for the other comparison



242 group (0.79 at 240 minutes versus 0.77 at 60 minutes). The ROC curves corresponding to baseline  
243 versus 100 mg (Fig S2) show that  $\rho$  outperforms cPDR90 for distinguishing mild SIM inhibition from  
244 none (AUC ranges: 0.61-0.66 for  $\rho$  and 0.55-0.60 for cPDR90). However, because  $\rho$  was not as  
245 accurate at distinguishing severe inhibition from no inhibition in these data (AUC range: 0.58-0.93),  
246 its AUC is always below the AUCs corresponding to cPDR90 in Fig 3. Additional ROC curves  
247 assuming the data is available at 15 min for hours 0-1, every 30 min for hours 1-4 is available in the  
248 SI appendix as an additional sensitivity analysis (Fig. S4).

249 *Assessment of consensus classifiers.* Table 1 shows the results of the consensus classifiers including  
250 cPDR90,  $\rho$ , and  $T_{50}$ , which were the three highest performing classifiers according to Fig. 2. The  
251 consensus classifiers including  $T_{peak}$  are available in the Supplementary Material, (Tables S1 through  
252 S4). Consistent with the results from the ROC curves, the performance statistics of the consensus  
253 classifiers (Table 1) show that cPDR90 alone has the highest accuracy and MCC for each of the four  
254 Reducose dose comparison groupings. However, for sensitivity, cPDR90 is outperformed by  $\rho$  and  $T_{50}$   
255 for the baseline versus 100 mg group, and by  $\rho \cup$  cPDR90 for 0 versus 750 mg and 0/100 versus 750  
256 mg. For the shorter test durations, cPDR90 continues to be the best classifier for all comparison  
257 groups for the 120-minute test length (Table S1). However,  $\rho$  and  $T_{50}$  surpass cPDR90 by the 90- and  
258 60-minutes lengths for the baseline versus 100 mg and 0 v 100/750 mg comparison groups (Tables S1  
259 and S2). The consensus classifiers also perform better than the individual classifiers at these shorter  
260 test durations. For example, at the 60-minute test duration,  $cPDR \cap T_{peak}$  and  $\rho \cap cPDR \cap T_{peak}$   
261 had the highest accuracy and MCC for the baseline versus 100 mg group (Table S1).

262 **Figure 3:** ROC curves for 60-, 90-, 120-, and 240-minute  $^{13}\text{C}$ -sucrose breath test durations for  
263 baseline versus either 100 or 750 mg doses of Reducose®, a mulberry leaf extract (MLE) that acts as  
264 a sucrase-isomaltase inhibitor (blue), and baseline or 100 mg MLE versus 750 mg MLE (orange).

265 **Table 1:** Accuracy, sensitivity, specificity, and Matthew’s Correlation Coefficient (MCC) of  
 266 consensus metrics for the 240-minute duration test.

|                    | $\rho$      | cPDR        | $T_{50}$    | $\rho \cap$<br>cPDR | $\rho \cap$<br>$T_{50}$ | cPDR<br>$\cap T_{50}$ | $\rho \cup$<br>cPDR $\cup$<br>$T_{50}$ | $\rho \cup$<br>cPDR | $\rho \cup$<br>$T_{50}$ | cPDR<br>$\cup T_{50}$ | Majority<br>rules |
|--------------------|-------------|-------------|-------------|---------------------|-------------------------|-----------------------|----------------------------------------|---------------------|-------------------------|-----------------------|-------------------|
| <b>Accuracy</b>    |             |             |             |                     |                         |                       |                                        |                     |                         |                       |                   |
| 0 v. 100 mg        | 0.66        | <b>0.72</b> | 0.66        | <b>0.72</b>         | 0.66                    | <b>0.72</b>           | 0.66                                   | 0.66                | 0.66                    | 0.66                  | 0.66              |
| 0 v. 750 mg        | 0.88        | <b>0.97</b> | 0.91        | 0.91                | 0.91                    | 0.91                  | 0.94                                   | 0.94                | 0.88                    | <b>0.97</b>           | 0.91              |
| 0/100 v. 750 mg    | 0.85        | <b>0.98</b> | 0.92        | 0.94                | 0.92                    | 0.94                  | 0.90                                   | 0.9                 | 0.85                    | 0.96                  | 0.92              |
| 0 v. 100/750 mg    | 0.71        | <b>0.81</b> | 0.62        | 0.73                | 0.62                    | 0.62                  | 0.79                                   | 0.79                | 0.71                    | <b>0.81</b>           | 0.73              |
| <b>Sensitivity</b> |             |             |             |                     |                         |                       |                                        |                     |                         |                       |                   |
| 0 v. 100 mg        | <b>0.94</b> | 0.81        | <b>0.94</b> | 0.81                | <b>0.94</b>             | 0.81                  | <b>0.94</b>                            | <b>0.94</b>         | <b>0.94</b>             | <b>0.94</b>           | <b>0.94</b>       |
| 0 v. 750 mg        | 0.88        | 0.94        | 0.81        | 0.81                | 0.81                    | 0.81                  | <b>1.00</b>                            | <b>1.00</b>         | 0.88                    | 0.94                  | 0.81              |
| 0/100 v. 750 mg    | 0.88        | 0.94        | 0.81        | 0.81                | 0.81                    | 0.81                  | <b>1.00</b>                            | <b>1.00</b>         | 0.88                    | 0.94                  | 0.81              |
| 0 v. 100/750 mg    | 0.72        | <b>0.91</b> | 0.44        | 0.72                | 0.44                    | 0.44                  | <b>0.91</b>                            | <b>0.91</b>         | 0.72                    | <b>0.91</b>           | 0.72              |
| <b>Specificity</b> |             |             |             |                     |                         |                       |                                        |                     |                         |                       |                   |
| 0 v. 100 mg        | 0.38        | <b>0.63</b> | 0.38        | <b>0.63</b>         | 0.38                    | 0.62                  | 0.38                                   | 0.38                | 0.38                    | 0.38                  | 0.38              |
| 0 v. 750 mg        | 0.88        | <b>1.00</b> | <b>1.00</b> | <b>1.00</b>         | <b>1.00</b>             | <b>1.00</b>           | 0.88                                   | 0.88                | 0.88                    | <b>1.00</b>           | <b>1.00</b>       |
| 0/100 v. 750 mg    | 0.84        | <b>1.00</b> | 0.97        | <b>1.00</b>         | 0.97                    | <b>1.00</b>           | 0.84                                   | 0.84                | 0.84                    | 0.97                  | 0.97              |
| 0 v. 100/750 mg    | 0.69        | 0.63        | <b>1.00</b> | 0.75                | <b>1.00</b>             | <b>1.00</b>           | 0.56                                   | 0.56                | 0.69                    | 0.62                  | 0.75              |
| <b>MCCs</b>        |             |             |             |                     |                         |                       |                                        |                     |                         |                       |                   |
| 0 v. 100 mg        | 0.38        | <b>0.45</b> | 0.38        | <b>0.45</b>         | 0.38                    | <b>0.45</b>           | 0.38                                   | 0.38                | 0.38                    | 0.38                  | 0.38              |
| 0 v. 750 mg        | 0.75        | <b>0.94</b> | 0.83        | 0.83                | 0.83                    | 0.83                  | 0.88                                   | 0.88                | 0.75                    | <b>0.94</b>           | 0.83              |
| 0/100 v. 750 mg    | 0.69        | <b>0.95</b> | 0.81        | 0.86                | 0.81                    | 0.86                  | 0.80                                   | 0.80                | 0.69                    | 0.91                  | 0.81              |
| 0 v. 100/750 mg    | 0.39        | <b>0.56</b> | 0.45        | 0.45                | 0.45                    | 0.45                  | 0.51                                   | 0.51                | 0.39                    | <b>0.56</b>           | 0.45              |

267

268

## 269 Discussion

270 In this analysis, we leveraged a mechanistic model to compare the performance of traditional,  
271 empirical classifiers (i.e., cPDR90,  $T_{50}$  and  $T_{peak}$ ) of  $^{13}\text{C}$ -SBT breath test to that of a mechanistic,  
272 pharmacokinetic model-based classifier. We found that, under typical data variation, 60-minute  
273 duration tests were insufficient to adequately project breath trajectories, primarily due to limited  
274 ability to observe some of the post-peak PDRr trajectory in these time lengths (Figure 1). Thus, we  
275 recommend  $^{13}\text{C}$ -SBT future protocols use a 120-minute or longer test duration. For the  $^{13}\text{C}$ -SBT, test  
276 durations up to 240 minutes saw enhanced accuracy and improvement in the performance of the  
277  $T_{50}$ ,  $T_{peak}$  and model-based classifier, but the ability to estimate SIM activity from a shorter-duration  
278 test supports the wider use of the  $^{13}\text{C}$ -SBT for gut dysfunction research and, potentially, for future  
279 clinical usage. However, other  $^{13}\text{C}$  breath tests may have different recommended durations if the  
280 distribution of peak PDRr is different for a different isotopic tracer, so further study of potential  
281 tracers could identify a substrate with a further reduced testing burden.

282 Our results from the classifier performance comparison show that cPDR90 was the best classifier (by  
283 AUC) at each test length, compared to  $\rho$ ,  $T_{50}$ , and  $T_{peak}$  (Fig. 2). These results suggest that, even  
284 though cPDR is not directly measuring the underlying biological mechanisms, slow cumulative  
285 recovery of the breath is highly informative. We also found that the consensus classifiers generally  
286 performed worse than the individual ones, largely because cPDR90 was highly accurate on its own for  
287 this population. However, as we see in Eq 2, the cumulative percent dose recovery is highly  
288 dependent on  $\kappa$ , the fraction of tracer that is excreted through the breath. Hence, the performance of  
289 cPDR will be highly sensitive to variations in this fraction or, as we previously showed [15], to  
290 misestimation of the production rate of  $\text{CO}_2$ ,  $V_{\text{CO}_2}$ , which is estimated based on body size. As a result,  
291 associations between cPDR and demographic or anthropometric variables may be introduced through  
292 differential bias in  $V_{\text{CO}_2}$  estimates. This limits the application of the cPDR to the  $^{13}\text{C}$ -as a test of EED  
293 in young children, because poorer growth is posited to be a key consequence of EED. We will explore  
294 anthropometric and demographic associations with breath curve dynamics in future work). Hence, we  
295 caution against taking our results as evidence that cPDR90 is the only classifier needed. Additionally,  
296 we note that both  $\rho$  and  $T_{peak}$  outperform cPDR90 for model sensitivity (Table 1) and for  
297 distinguishing the 100 mg dose from baseline (Fig. S2). Currently, it is unknown whether SIM  
298 inhibition in typical a case of EED is more similar to the inhibition induced by the 100 mg MLE dose  
299 or the 750 mg dose.

300 We found that some classifiers were quite accurate at shorter test lengths or even had a higher AUC at  
301 shorter test lengths. For example, the  $T_{peak}$  AUC for 0 mg v. 100 mg has a higher AUC (0.68) when  
302 generated from the 60-minute data as opposed to the 240-minute data (AUC = 0.61). However, this  
303 result does not necessarily indicate that those classifiers were robust to a shorter test length. Rather,

304 this behavior is a data artifact: the curves estimated at the shorter test lengths are often poor fits to the  
305 full breath curve (Fig S1), and thus they happen to have better classifier performance only by  
306 accident. The same classifier might perform drastically worse on a different dataset for that test  
307 duration. This phenomenon is not a limitation of our analysis but a limitation of short-duration breath  
308 tests, and it has implications for future studies. Participants do not always complete the full breath  
309 collection protocol, but researchers may want to include the data that were collected. We advise  
310 having a clear exclusion criterion in  $^{13}\text{C}$ -SBT studies for participants who do not complete at least 90-  
311 min of breath collection.

312 The primary strength of this study is the crossover study design. The experimental design artificially  
313 induced SIM inhibition in the study participants, making the comparison between experiments  
314 unconfounded by other factors that would be likely present in cases and controls from separate  
315 populations. However, because the data is from healthy adult participants for whom SIM was  
316 experimentally inhibited, the performance of the classifiers may be different from the target  
317 population, i.e., children in low-resource settings, which means that the external generalizability may  
318 be limited. In addition, the small samples size makes the results more sensitive to random  
319 measurement error. For the  $^{13}\text{C}$ -SBT to move from being a specialized research tool to wider  
320 useability, further research that includes a larger sample size and inclusion of study participants from  
321 the target population will be needed. Our results facilitate this work by suggesting a shortened, 120-  
322 minute test duration, that may be more feasible for infants and young children compared to the prior,  
323 standard 4-hour test.

## 324 **Conclusion**

325 We assessed the performance of two empirical classifiers,  $\text{cPDR}_{90}$ ,  $T_{50}$ , and  $T_{peak}$ , and one model-  
326 based classifier,  $\rho$  for the SBT over different test lengths. Based on curves fit to different test lengths,  
327 we recommend that  $^{13}\text{C}$ -SBT protocols include 120-min or longer test durations and that participants  
328 who collect less than 90 min of breath be excluded. We found that, overall,  $\text{cPDR}_{90}$  was the most  
329 accurate classifier in these data; however, limitations of this classifier include uncertainty around its  
330 performance in the target population and lower sensitivity in detecting cases of mild SIM inhibition.  
331 The model-based classifier  $\rho$  addresses both concerns because it is more reflective of the underlying  
332 biological processes giving rise to the PDRr curves. We recommend multiple classifiers continue to  
333 be considered in future work assessing the performance of the  $^{13}\text{C}$ -SBT as a diagnostic test of EED or  
334 other dysfunctions that reduce SIM activity.

335

336

337

338 **Author contributions**

339 Conceptualization (of this analysis): AFB, GOL, DJM; Methodology: AFB, HVW; Investigation:  
340 RJS, CAE, DJM; Formal Analysis: HVW; Visualization: HVW; Writing - Original Draft: HVW;  
341 Writing - Review & Editing: AFB, GOL, HVW, DJM. Supervision: DJM (lab), AFB (analysis). All  
342 authors read and approved the final manuscript.

343

344 **Acknowledgements**

345 This project was funded through the International Atomic Energy Agency (IAEA) coordinated  
346 research projects E4.10.16 and E430336, United States National Science Foundation (NSF) grant  
347 DMS1853032, and United States National Institutes of Health (NIH) grant K01AI145080. The NSF  
348 and NIH were not involved in study design; collection, analysis, and interpretation of data; writing of  
349 the report. The IAEA was involved in study design of the data collection. We also thank Dr. Mamane  
350 Zeilani, Nutriset for part-funding of this work and Dr. Andrew Gallagher of Phynova Group Ltd for  
351 the supply of Reducose for this study. The industry collaborators had no role in study design,  
352 collection, analysis, interpretation of the data or writing of the report.

353 **Conflict of Interest declaration**

354 The authors declare that they have no conflicts of interest.

355

356 **Data Availability Statement**

357

358

## 359 **References**

- 360 [1] Keusch GT, Denno DM, Black RE, Duggan C, Guerrant RL, Lavery JV, et al. Environmental  
361 enteric dysfunction: pathogenesis, diagnosis, and clinical consequences. *Clinical Infectious*  
362 *Diseases*. 2014;59(suppl 4):S207-12.
- 363 [2] Crane RJ, Jones KD, Berkley JA. Environmental enteric dysfunction: an overview. *Food and*  
364 *nutrition bulletin*. 2015;36(1 suppl1):S76-87.
- 365 [3] Korpe PS, Petri WA. Environmental enteropathy: critical implications of a poorly understood  
366 condition. *Trends in molecular medicine*. 2012;18(6):328-36.
- 367 [4] Tickell KD, Atlas HE, Watson JL. Environmental enteric dysfunction: a review of potential  
368 mechanisms, consequences and management strategies. *BMC medicine*. 2019;17:1-9.
- 369 [5] Ta-Chiang Liu TC, VanBuskirk K, Ali SA, Kelly P, Holtz LR, Yilmaz OH. A novel  
370 histological index for evaluation of environmental enteric dysfunction identifies geographic-  
371 specific features of enteropathy among children with suboptimal growth. *PLoS Neglected*  
372 *Tropical Diseases*. 2020; 14(1), e0007975.
- 373 [6] Hodges P, Tembo M, Kelly P. Intestinal biopsies for the evaluation of environmental  
374 enteropathy and environmental enteric dysfunction. *The Journal of Infectious Diseases*.  
375 2021;224(Supplement 7):S856-63.
- 376 [7] Lee GO, Kosek P, Lima AA, Singh R, Yori PP, Olortegui MP, et al. Lactulose: mannitol  
377 diagnostic test by HPLC and LC-MSMS platforms: considerations for field studies of  
378 intestinal barrier function and environmental enteropathy. *Journal of pediatric*  
379 *gastroenterology and nutrition*. 2014;59(4):544.
- 380 [8] Schillinger RJ, Mwakamui S, Mulenga C, Tembo M, Hodges P, Besa E, et al. 13C-sucrose  
381 breath test for the non-invasive assessment of environmental enteropathy in Zambian adults.  
382 *Frontiers in Medicine*. 2022;9:904339.
- 383 [9] Gorvel J, Ferrero A, Chambraud L, Rigal A, Bonicel J, Maroux S. Expression of  
384 sucraseisomaltase and dipeptidylpeptidase IV in human small intestine and colon.  
385 *Gastroenterology*. 1991;101(3):618-25.
- 386 [10] Gupta SK, Chong SK, Fitzgerald JF. Disaccharidase activities in children: normal values and  
387 comparison based on symptoms and histologic changes. *Journal of pediatric gastroenterology*  
388 *and nutrition*. 1999;28(3):246-51.

- 389 [11] Yu J, Ordiz MI, Stauber J, Shaikh N, Trehan I, Barnell E, et al. Environmental enteric  
390 dysfunction includes a broad spectrum of inflammatory responses and epithelial repair  
391 processes. *Cellular and molecular gastroenterology and hepatology*. 2016;2(2):158-74.
- 392 [12] Ritchie BK, Brewster DR, Davidson GP, Tran CD, McNeil Y, Hawkes JS, et al. 13C-sucrose  
393 breath test: novel use of a noninvasive biomarker of environmental gut health. *Pediatrics*.  
394 2009;124(2):620-6.
- 395 [13] Ghos YF, Maes BD, Geypens BJ, Mys G, Hiele MI, Rutgeerts PJ, et al. Measurement of  
396 gastric emptying rate of solids by means of a carbon-labeled octanoic acid breath test.  
397 *Gastroenterology*. 1993;104(6):1640-7.
- 398 [14] Maes B, Mys G, Geypens B, Evenepoel P, Ghos Y, Rutgeerts P. Gastric emptying flow  
399 curves separated from carbon-labeled octanoic acid breath test results. *American Journal of*  
400 *Physiology-Gastrointestinal and Liver Physiology*. 1998;275(1):G169-75.
- 401 [15] Brouwer AF, Lee GO, Schillinger RJ, Edwards CA, Wyk HV, Yazbeck R, et al. Mechanistic  
402 inference of the metabolic rates underlying 13 C breath test curves. *Journal of*  
403 *Pharmacokinetics and Pharmacodynamics*. 2023:1-12.
- 404 [16] Brouwer AF, Lee GO, Van Wyk H, Schillinger RJ, Edwards CA, Morrison DJ. A model-  
405 based 13C-sucrose breath test diagnostic for gut function disorders characterized by a  
406 loss of sucrase-isomaltase enzymatic activity. *The Journal of Nutrition*. 2023
- 407 [17] Hajian-Tilaki K. Receiver operating characteristic (ROC) curve analysis for medical diagnostic  
408 test evaluation. *Caspian journal of internal medicine*. 2013;4(2):627.
- 409 [18] Fluss R, Faraggi D, Reiser B. Estimation of the Youden Index and its associated cutoff point.  
410 *Biometrical Journal: Journal of Mathematical Methods in Biosciences*.  
411 2005;47(4):458-72.
- 412 [19] Chicco D, Jurman G. The advantages of the Matthews correlation coefficient (MCC) over F1  
413 score and accuracy in binary classification evaluation. *BMC genomics*. 2020;21(1):113.

414

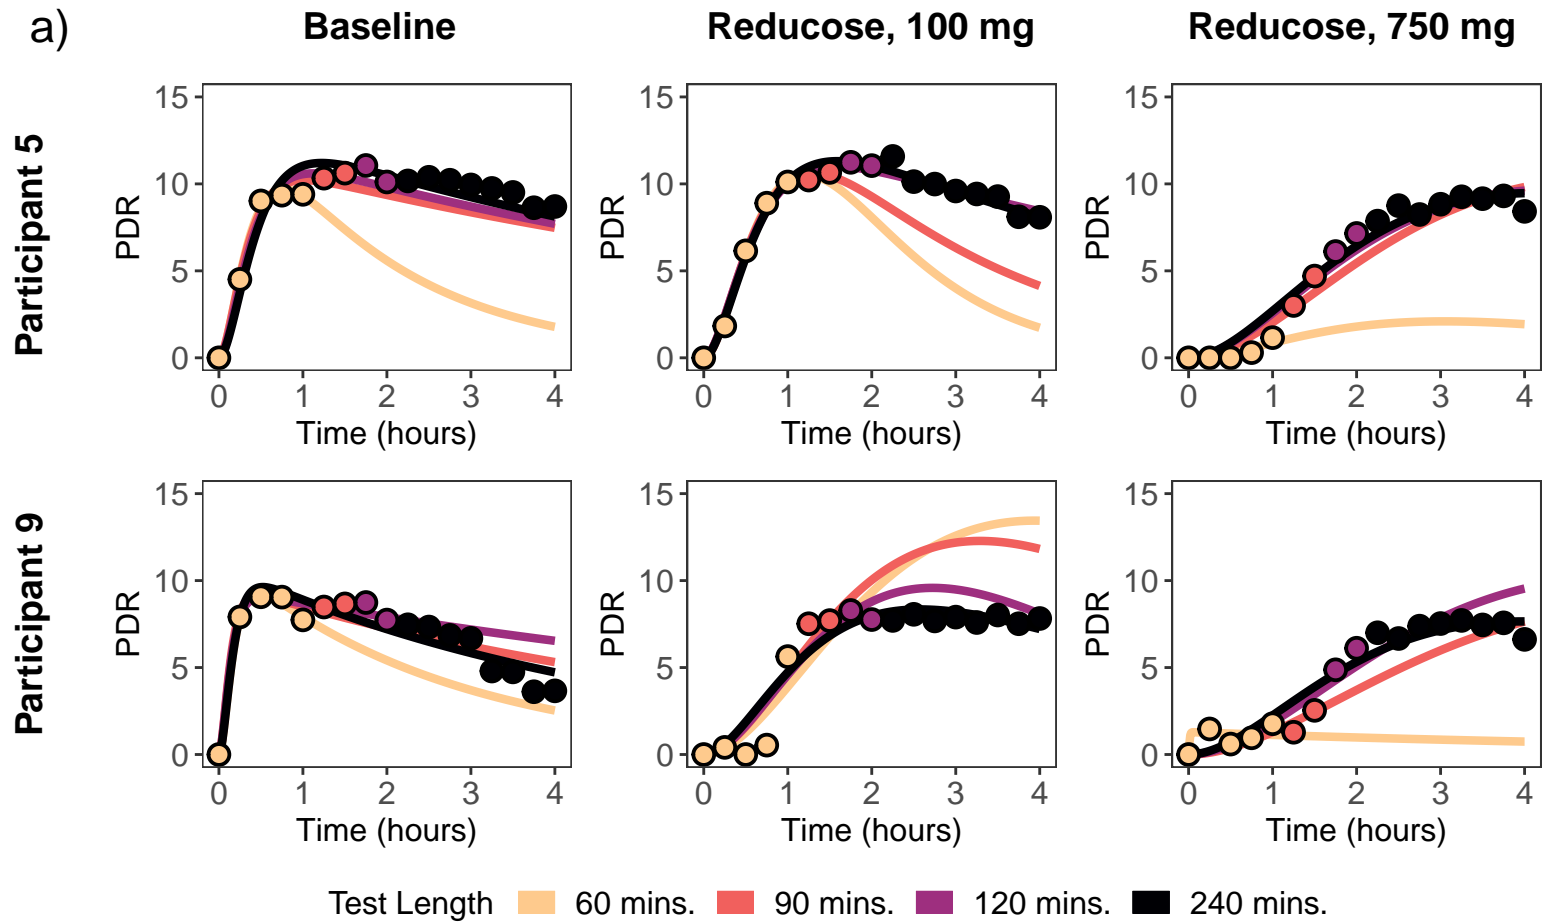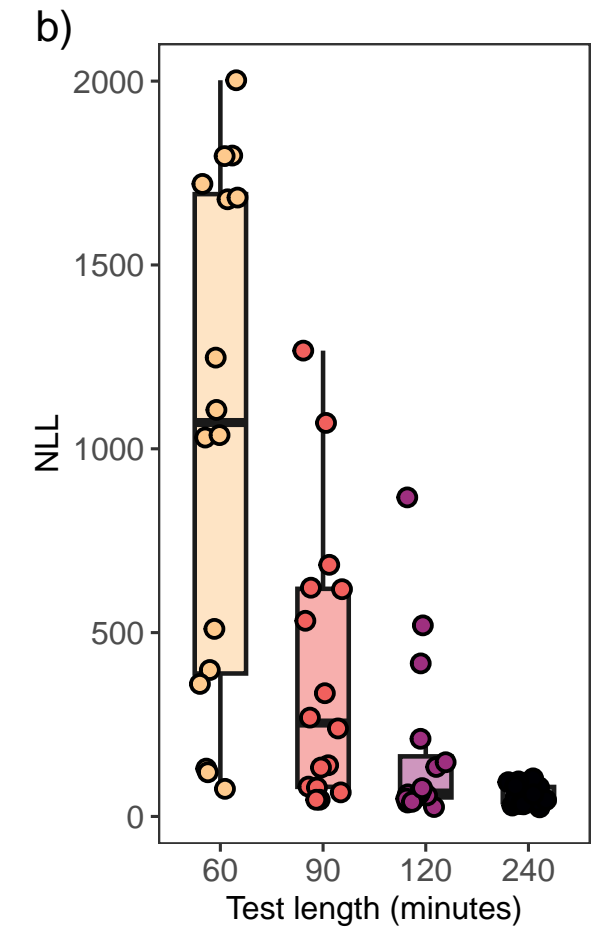



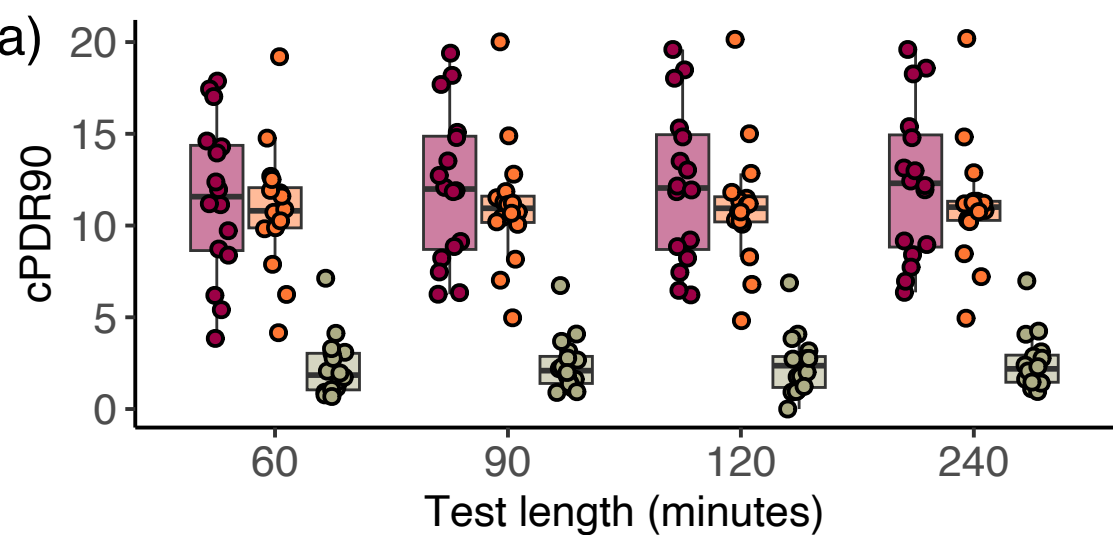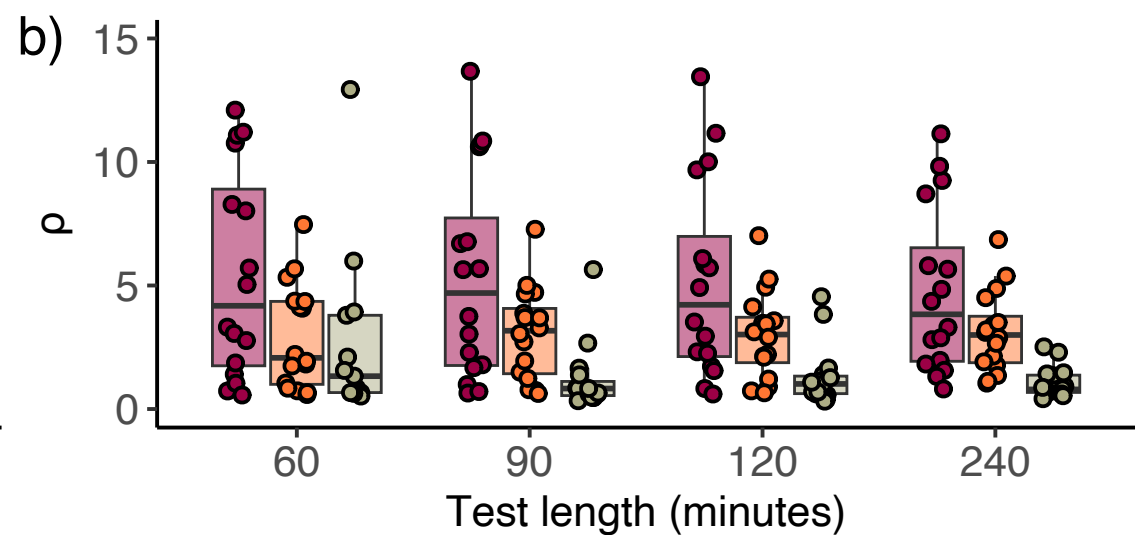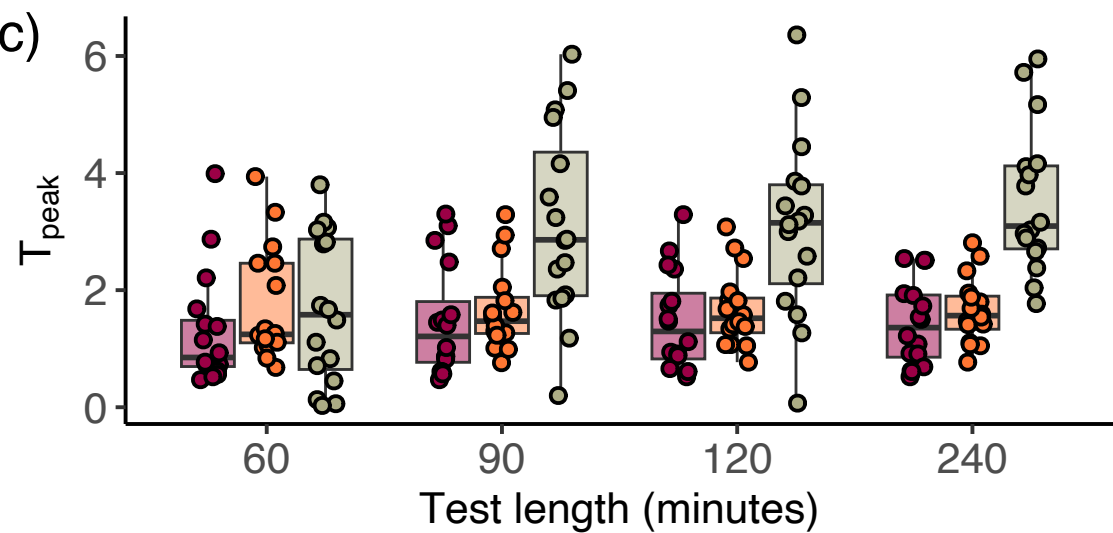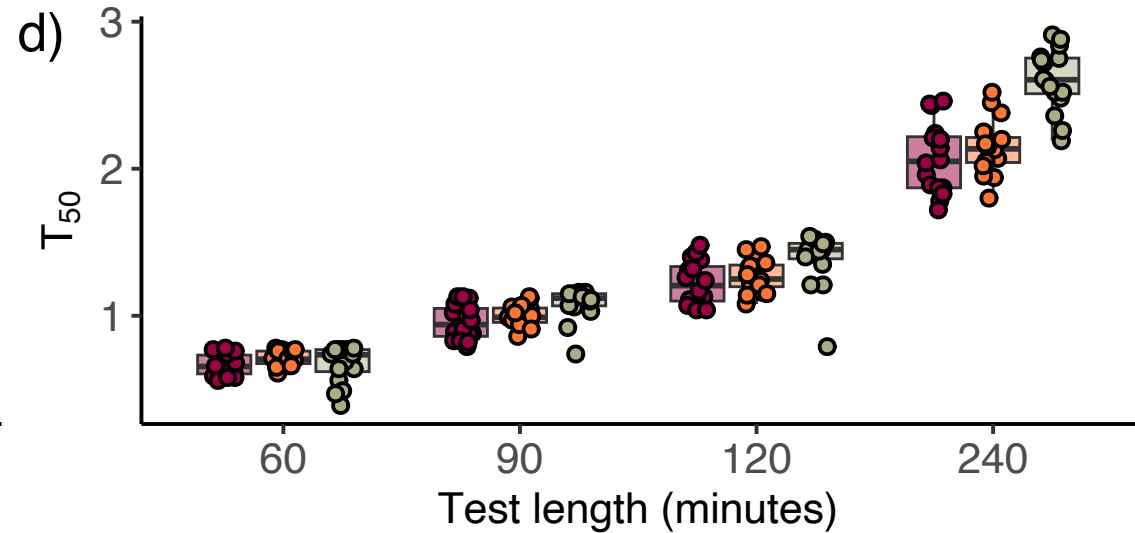

MLE dose 0 mg 100 mg 750 mg

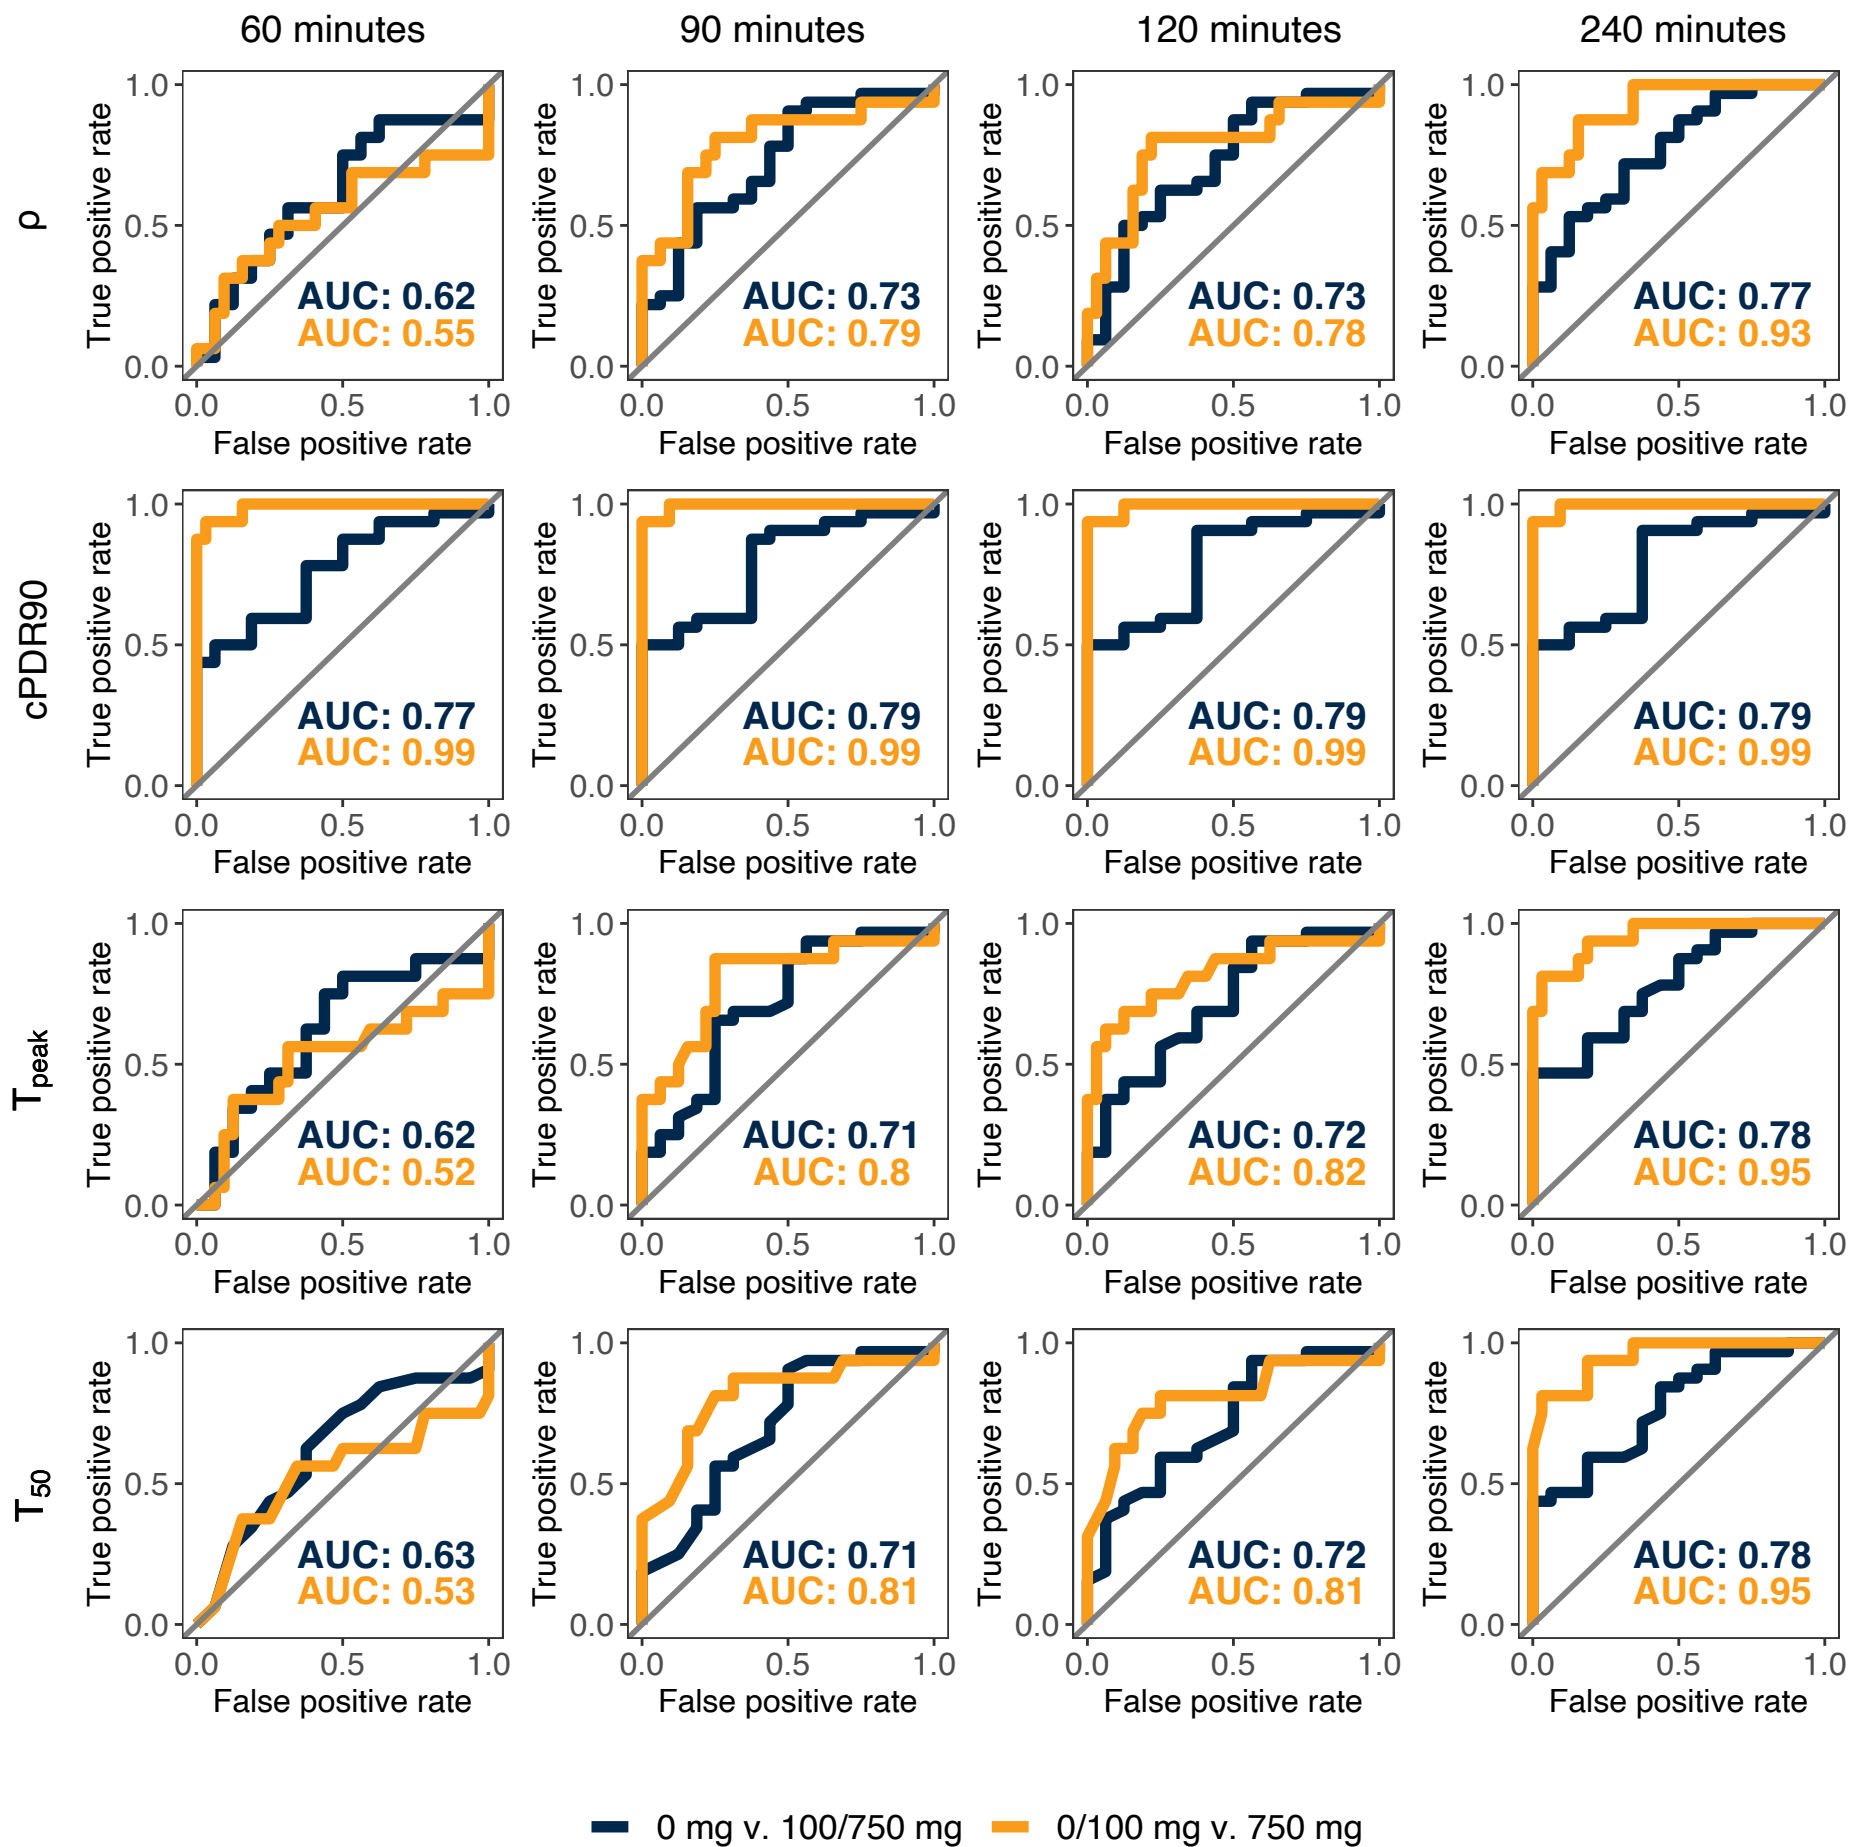

Source: https://www.medrxiv.org/content/10.1101/2024.05.01.24306704.full.pdf
